# Supplementary material for: Tumor infiltrating lymphocyte stratification of prognostic staging of early-stage triple negative breast cancer
Source: PubMed Central journal article supplement (PMC8752727; doi:10.1038/s41523-021-00362-1), 2022-01-11
Supplement: 41523_2021_362_MOESM1_ESM.pdf [file 41523_2021_362_MOESM1_ESM.pdf]

**Supplementary Table 1. Estimated 5-year survival probabilities according to Pathological Prognostic Stage and stratified by TILs in triple-negative breast cancer patients treated in the adjuvant setting with anthracycline-based chemotherapy with or without taxanes.**

OS: overall survival, iDFS: invasive-disease free survival, D-DFS: distant disease-free survival (for definitions see Loi et al JCO 2019). The 5-year Kaplan-Meier estimates are provided together with bootstrap confidence intervals (1000 samples).

| T size   | Nodal status | Grade | Pathological Prognostic Stage Group | N   | TIL group<br>High ≥30%<br>Low <30% | 5-Yr OS             | 5-Yr iDFS           | 5-Yr D-DFS          |
|----------|--------------|-------|-------------------------------------|-----|------------------------------------|---------------------|---------------------|---------------------|
| T1 <2cm  | N0           | G1    | IA                                  | 0   | High                               |                     |                     |                     |
| T1       | N0           | G1    | IA                                  | 3   | Low                                |                     |                     |                     |
| T1       | N0           | G2    | IB                                  | 6   | High                               | 0.95                | 0.86                | 0.91                |
| T1       | N0           | G3    | IB                                  | 86  |                                    | [0.91;0.99]         | [0.80;0.92]         | [0.86;0.96]         |
| T1       | N0           | G2    | IB                                  | 47  | Low                                | 0.90                | 0.84                | 0.88                |
| T1       | N0           | G3    | IB                                  | 171 |                                    | [0.86;0.93]         | [0.80;0.88]         | [0.84;0.92]         |
| T1       | N1 (1-3)     | G1    | IIA                                 | 14  | High                               | 0.96<br>[0.94;0.98] | 0.89<br>[0.85;0.92] | 0.94<br>[0.91;0.97] |
| T2 2-5cm | N0           | G1    | IIA                                 | 1   |                                    |                     |                     |                     |
| T1       | N1           | G2    | IIA                                 | 13  |                                    |                     |                     |                     |
| T2       | N0           | G2    | IIA                                 | 5   |                                    |                     |                     |                     |
| T1       | N1           | G3    | IIA                                 | 79  |                                    |                     |                     |                     |
| T2       | N0           | G3    | IIA                                 | 98  | Low                                | 0.86<br>[0.83;0.89] | 0.76<br>[0.73;0.80] | 0.83<br>[0.80;0.85] |
| T1       | N1           | G1    | IIA                                 | 34  |                                    |                     |                     |                     |
| T2       | N0           | G1    | IIA                                 | 1   |                                    |                     |                     |                     |
| T1       | N1           | G2    | IIA                                 | 39  |                                    |                     |                     |                     |
| T2       | N0           | G2    | IIA                                 | 34  |                                    |                     |                     |                     |
| T1       | N1           | G3    | IIA                                 | 126 | High                               | 0.85<br>[0.74;0.93] | 0.81<br>[0.71;0.91] | 0.83<br>[0.74;0.93] |
| T2       | N0           | G3    | IIA                                 | 178 |                                    |                     |                     |                     |
| T2       | N1           | G1    | IIB                                 | 32  |                                    |                     |                     |                     |
| T3 >5cm  | N0           | G1    | IIB                                 | 0   |                                    |                     |                     |                     |
| T2       | N1           | G2    | IIB                                 | 12  |                                    |                     |                     |                     |
| T3       | N0           | G2    | IIB                                 | 0   | Low                                | 0.82<br>[0.74;0.90] | 0.71<br>[0.61;0.81] | 0.76<br>[0.67;0.84] |
| T2       | N1           | G1    | IIB                                 | 25  |                                    |                     |                     |                     |
| T3       | N0           | G1    | IIB                                 | 0   |                                    |                     |                     |                     |
| T2       | N1           | G2    | IIB                                 | 40  |                                    |                     |                     |                     |
| T3       | N0           | G2    | IIB                                 | 0   |                                    |                     |                     |                     |
| T2       | N1           | G3    | IIIA                                | 103 | High                               | 0.81<br>[0.75;0.86] | 0.75<br>[0.69;0.81] | 0.79<br>[0.73;0.84] |
| T3       | N0           | G3    | IIIA                                | 5   |                                    |                     |                     |                     |
| T1       | N2 (≥4)      | G1    | IIIA                                | 8   |                                    |                     |                     |                     |
| T2       | N2           | G1    | IIIA                                | 17  |                                    |                     |                     |                     |
| T3       | N1           | G1    | IIIA                                | 1   |                                    |                     |                     |                     |
| T3       | N2           | G1    | IIIA                                | 0   | Low                                | 0.69<br>[0.64;0.74] | 0.60<br>[0.55;0.65] | 0.65<br>[0.60;0.69] |
| T2       | N1           | G3    | IIIA                                | 201 |                                    |                     |                     |                     |
| T3       | N0           | G3    | IIIA                                | 12  |                                    |                     |                     |                     |
| T1       | N2           | G1    | IIIA                                | 10  |                                    |                     |                     |                     |
| T2       | N2           | G1    | IIIA                                | 12  |                                    |                     |                     |                     |
| T3       | N1           | G1    | IIIA                                | 1   | High                               | 0.62<br>[0.38;0.83] | 0.57<br>[0.36;0.79] | 0.62<br>[0.39;0.85] |
| T3       | N2           | G1    | IIIA                                | 3   |                                    |                     |                     |                     |
| T1       | N2           | G2    | IIIB                                | 6   |                                    |                     |                     |                     |
| T2       | N2           | G2    | IIIB                                | 6   |                                    |                     |                     |                     |
| T3       | N1           | G2    | IIIB                                | 0   |                                    |                     |                     |                     |
| T3       | N2           | G2    | IIIB                                | 2   | Low                                | 0.64<br>[0.52;0.74] | 0.49<br>[0.37;0.59] | 0.52<br>[0.41;0.64] |
| T1       | N2           | G2    | IIIB                                | 15  |                                    |                     |                     |                     |
| T2       | N2           | G2    | IIIB                                | 26  |                                    |                     |                     |                     |
| T3       | N1           | G2    | IIIB                                | 5   |                                    |                     |                     |                     |
| T3       | N2           | G2    | IIIB                                | 5   |                                    |                     |                     |                     |
| T1       | N2           | G3    | IIIC                                | 34  | High                               | 0.74<br>[0.68;0.81] | 0.67<br>[0.60;0.74] | 0.69<br>[0.61;0.76] |
| T2       | N2           | G3    | IIIC                                | 65  |                                    |                     |                     |                     |
| T3       | N1           | G3    | IIIC                                | 5   |                                    |                     |                     |                     |

| T size | Nodal status | Grade | Pathological Prognostic Stage Group | N   | TIL group<br>High $\geq 30\%$<br>Low $< 30\%$ | 5-Yr OS             | 5-Yr iDFS           | 5-Yr D-DFS          |
|--------|--------------|-------|-------------------------------------|-----|-----------------------------------------------|---------------------|---------------------|---------------------|
| T3     | N2           | G3    | IIC                                 | 7   |                                               |                     |                     |                     |
| T1     | N2           | G3    | IIC                                 | 59  | Low                                           | 0.58<br>[0.52;0.63] | 0.49<br>[0.44;0.55] | 0.54<br>[0.48;0.59] |
| T2     | N2           | G3    | IIC                                 | 127 |                                               |                     |                     |                     |
| T3     | N1           | G3    | IIC                                 | 13  |                                               |                     |                     |                     |
| T3     | N2           | G3    | IIC                                 | 34  |                                               |                     |                     |                     |

**Supplementary Table 2 : Estimated 5-year survival probabilities according to Pathological Prognostic Stage and stratified TILs in triple-negative breast cancer patients treated with anthracycline-based chemotherapy with taxanes in the adjuvant setting.**

OS: overall survival, IDFS: invasive-disease free survival, D-DFS: distant disease-free survival (for definitions see Loi et al JCO 2019). The 5-year Kaplan-Meier estimates are provided together with bootstrap confidence intervals (1000 samples).

| T size   | Nodal status    | Grade | Pathological Prognostic Stage Group | N  | TIL group High $\geq 30\%$ Low $< 30\%$ | 5-Yr OS          | 5-Yr IDFS        | 5-Yr D-DFS       |
|----------|-----------------|-------|-------------------------------------|----|-----------------------------------------|------------------|------------------|------------------|
| T1 <2cm  | N0              | G1    | IA                                  | 0  | High                                    |                  |                  |                  |
| T1       | N0              | G1    | IA                                  | 2  | Low                                     |                  |                  |                  |
| T1       | N0              | G2    | IB                                  | 2  | High                                    | 0.86 [0.62;1]    | 0.80 [0.60;1]    | 0.86 [0.60;1]    |
| T1       | N0              | G3    | IB                                  | 8  |                                         |                  |                  |                  |
| T1       | N0              | G2    | IB                                  | 8  | Low                                     | 0.92 [0.84;0.98] | 0.90 [0.81;0.96] | 0.93 [0.86;0.98] |
| T1       | N0              | G3    | IB                                  | 42 |                                         |                  |                  |                  |
| T1       | N1 (1-3)        | G1    | IIA                                 | 6  | High                                    | 0.98 [0.94;1]    | 0.96 [0.91;1]    | 0.98 [0.95;1]    |
| T2 2-5cm | N0              | G1    | IIA                                 | 0  |                                         |                  |                  |                  |
| T1       | N1              | G2    | IIA                                 | 6  |                                         |                  |                  |                  |
| T2       | N0              | G2    | IIA                                 | 0  |                                         |                  |                  |                  |
| T1       | N1              | G3    | IIA                                 | 25 |                                         |                  |                  |                  |
| T2       | N0              | G3    | IIA                                 | 19 |                                         |                  |                  |                  |
| T1       | N1              | G1    | IIA                                 | 12 | Low                                     | 0.85 [0.80;0.90] | 0.75 [0.69;0.81] | 0.82 [0.76;0.87] |
| T2       | N0              | G1    | IIA                                 | 0  |                                         |                  |                  |                  |
| T1       | N1              | G2    | IIA                                 | 19 |                                         |                  |                  |                  |
| T2       | N0              | G2    | IIA                                 | 7  |                                         |                  |                  |                  |
| T1       | N1              | G3    | IIA                                 | 54 |                                         |                  |                  |                  |
| T2       | N0              | G3    | IIA                                 | 52 |                                         |                  |                  |                  |
| T2       | N1              | G1    | IIB                                 | 12 | High                                    | 0.82 [0.65;0.94] | 0.78 [0.61;0.94] | 0.83 [0.66;0.95] |
| T3 >5cm  | N0              | G1    | IIB                                 | 0  |                                         |                  |                  |                  |
| T2       | N1              | G2    | IIB                                 | 7  |                                         |                  |                  |                  |
| T3       | N0              | G2    | IIB                                 | 0  | Low                                     | 0.79 [0.67;0.91] | 0.63 [0.50;0.76] | 0.68 [0.56;0.80] |
| T2       | N1              | G1    | IIB                                 | 19 |                                         |                  |                  |                  |
| T3       | N0              | G1    | IIB                                 | 0  |                                         |                  |                  |                  |
| T2       | N1              | G2    | IIB                                 | 18 |                                         |                  |                  |                  |
| T3       | N0              | G2    | IIB                                 | 0  |                                         |                  |                  |                  |
| T2       | N1              | G3    | IIIA                                | 41 | High                                    | 0.83 [0.74;0.92] | 0.79 [0.69;0.88] | 0.83 [0.73;0.92] |
| T3       | N0              | G3    | IIIA                                | 1  |                                         |                  |                  |                  |
| T1       | N2 ( $\geq 4$ ) | G1    | IIIA                                | 2  |                                         |                  |                  |                  |
| T2       | N2              | G1    | IIIA                                | 4  |                                         |                  |                  |                  |
| T3       | N1              | G1    | IIIA                                | 1  |                                         |                  |                  |                  |
| T3       | N2              | G1    | IIIA                                | 0  |                                         |                  |                  |                  |
| T2       | N1              | G3    | IIIA                                | 88 | Low                                     | 0.68 [0.60;0.76] | 0.58 [0.50;0.65] | 0.63 [0.55;0.71] |
| T3       | N0              | G3    | IIIA                                | 3  |                                         |                  |                  |                  |
| T1       | N2              | G1    | IIIA                                | 8  |                                         |                  |                  |                  |
| T2       | N2              | G1    | IIIA                                | 7  |                                         |                  |                  |                  |
| T3       | N1              | G1    | IIIA                                | 1  |                                         |                  |                  |                  |
| T3       | N2              | G1    | IIIA                                | 2  |                                         |                  |                  |                  |
| T1       | N2              | G2    | IIIB                                | 4  |                                         |                  |                  |                  |
| T2       | N2              | G2    | IIIB                                | 4  |                                         |                  |                  |                  |
| T3       | N1              | G2    | IIIB                                | 0  |                                         |                  |                  |                  |
| T3       | N2              | G2    | IIIB                                | 0  |                                         |                  |                  |                  |
| T1       | N2              | G2    | IIIB                                | 6  | Low                                     | 0.69 [0.54;0.84] | 0.50 [0.34;0.65] | 0.53 [0.37;0.69] |
| T2       | N2              | G2    | IIIB                                | 12 |                                         |                  |                  |                  |
| T3       | N1              | G2    | IIIB                                | 4  |                                         |                  |                  |                  |
| T3       | N2              | G2    | IIIB                                | 4  |                                         |                  |                  |                  |
| T1       | N2              | G3    | IIIC                                | 14 |                                         |                  |                  |                  |
| T2       | N2              | G3    | IIIC                                | 22 |                                         |                  |                  |                  |

| T size | Nodal status | Grade | Pathological Prognostic Stage Group | N  | TIL group<br>High $\geq 30\%$<br>Low $< 30\%$ | 5-Yr OS             | 5-Yr IDFS           | 5-Yr D-DFS          |
|--------|--------------|-------|-------------------------------------|----|-----------------------------------------------|---------------------|---------------------|---------------------|
| T3     | N1           | G3    | IIIC                                | 4  | Low                                           | 0.58<br>[0.49;0.67] | 0.54<br>[0.45;0.63] | 0.57<br>[0.48;0.66] |
| T3     | N2           | G3    | IIIC                                | 4  |                                               |                     |                     |                     |
| T1     | N2           | G3    | IIIC                                | 22 |                                               |                     |                     |                     |
| T2     | N2           | G3    | IIIC                                | 47 |                                               |                     |                     |                     |
| T3     | N1           | G3    | IIIC                                | 8  |                                               |                     |                     |                     |
| T3     | N2           | G3    | IIIC                                | 14 |                                               |                     |                     |                     |



**Supplementary Table 2a: Estimated 5-year survival probabilities according to Clinical Prognostic Stage and stratified by TILs in triple-negative breast cancer patients treated with anthracycline-based chemotherapy with or without taxanes in the adjuvant setting.**

OS: overall survival, IDFS: invasive-disease free survival, D-DFS: distant disease-free survival (for definitions see Loi et al JCO 2019). The 5-year Kaplan-Meier estimates are provided together with bootstrap confidence intervals (1000 samples).

| T size   | Nodal status | Grade | Clinic Prognostic Stage Group | N   | TIL group<br>High<br>≥30%<br>Low<br><30% | 5 Yr OS             | 5 Yr IDFS           | 5 Yr D-DDFS         |
|----------|--------------|-------|-------------------------------|-----|------------------------------------------|---------------------|---------------------|---------------------|
| T1 <2cm  | N0           | G1    | IB                            | 0   | High                                     | 0.95<br>[0.91;0.99] | 0.86<br>[0.80;0.92] | 0.91<br>[0.86;0.96] |
| T1       | N0           | G2    | IB                            | 6   |                                          |                     |                     |                     |
| T1       | N0           | G3    | IB                            | 86  |                                          |                     |                     |                     |
| T1       | N0           | G1    | IB                            | 3   | Low                                      | 0.90<br>[0.87;0.94] | 0.84<br>[0.79;0.88] | 0.88<br>[0.85;0.92] |
| T1       | N0           | G2    | IB                            | 47  |                                          |                     |                     |                     |
| T1       | N0           | G3    | IB                            | 171 |                                          |                     |                     |                     |
| T1       | N1 (1-3)     | G1    | IIA                           | 14  | High                                     | 1 [1;1]             | 0.93 [0.79;1]       | 0.93 [0.79;1]       |
| T2 2-5cm | N0           | G1    | IIA                           | 1   |                                          |                     |                     |                     |
| T1       | N1           | G1    | IIA                           | 34  |                                          |                     |                     |                     |
| T2       | N0           | G1    | IIA                           | 1   | Low                                      | 0.85<br>[0.74;0.94] | 0.78<br>[0.64;0.88] | 0.85<br>[0.74;0.94] |
| T1       | N1           | G2    | IIB                           | 13  | High                                     | 0.94<br>[0.92;0.97] | 0.87<br>[0.84;0.91] | 0.93<br>[0.90;0.95] |
| T2       | N0           | G2    | IIB                           | 5   |                                          |                     |                     |                     |
| T1       | N1           | G3    | IIB                           | 79  |                                          |                     |                     |                     |
| T2       | N0           | G3    | IIB                           | 98  |                                          |                     |                     |                     |
| T2       | N1           | G1    | IIB                           | 32  |                                          |                     |                     |                     |
| T3 >5cm  | N0           | G1    | IIB                           | 0   |                                          |                     |                     |                     |
| T1       | N1           | G2    | IIB                           | 39  | Low                                      | 0.86<br>[0.83;0.88] | 0.76<br>[0.72;0.79] | 0.82<br>[0.78;0.85] |
| T2       | N0           | G2    | IIB                           | 34  |                                          |                     |                     |                     |
| T1       | N1           | G3    | IIB                           | 126 |                                          |                     |                     |                     |
| T2       | N0           | G3    | IIB                           | 178 |                                          |                     |                     |                     |
| T2       | N1           | G1    | IIB                           | 25  |                                          |                     |                     |                     |
| T3       | N0           | G1    | IIB                           | 0   |                                          |                     |                     |                     |
| T2       | N1           | G2    | IIIB                          | 12  | High                                     | 0.79<br>[0.74;0.84] | 0.74<br>[0.68;0.80] | 0.78<br>[0.72;0.83] |
| T3       | N0           | G2    | IIIB                          | 0   |                                          |                     |                     |                     |
| T2       | N1           | G3    | IIIB                          | 103 |                                          |                     |                     |                     |
| T3       | N0           | G3    | IIIB                          | 5   |                                          |                     |                     |                     |
| T1       | N2 (≥4)      | G1    | IIIB                          | 8   |                                          |                     |                     |                     |
| T2       | N2           | G1    | IIIB                          | 17  |                                          |                     |                     |                     |
| T3       | N1           | G1    | IIIB                          | 1   |                                          |                     |                     |                     |
| T3       | N2           | G1    | IIIB                          | 0   |                                          |                     |                     |                     |
| T1       | N2           | G2    | IIIB                          | 6   |                                          |                     |                     |                     |
| T2       | N2           | G2    | IIIB                          | 6   |                                          |                     |                     |                     |
| T3       | N1           | G2    | IIIB                          | 0   |                                          |                     |                     |                     |
| T3       | N2           | G2    | IIIB                          | 2   |                                          |                     |                     |                     |
| T2       | N1           | G2    | IIIB                          | 40  |                                          |                     |                     |                     |
| T3       | N0           | G2    | IIIB                          | 0   |                                          |                     |                     |                     |
| T2       | N1           | G3    | IIIB                          | 201 |                                          |                     |                     |                     |
| T3       | N0           | G3    | IIIB                          | 12  |                                          |                     |                     |                     |
| T1       | N2           | G1    | IIIB                          | 10  |                                          |                     |                     |                     |
| T2       | N2           | G1    | IIIB                          | 12  |                                          |                     |                     |                     |
| T3       | N1           | G1    | IIIB                          | 1   |                                          |                     |                     |                     |
| T3       | N2           | G1    | IIIB                          | 3   |                                          |                     |                     |                     |
| T1       | N2           | G2    | IIIB                          | 15  |                                          |                     |                     |                     |
| T2       | N2           | G2    | IIIB                          | 26  |                                          |                     |                     |                     |
| T3       | N1           | G2    | IIIB                          | 5   |                                          |                     |                     |                     |
| T3       | N2           | G2    | IIIB                          | 5   |                                          |                     |                     |                     |
| T1       | N2           | G3    | IIIC                          | 34  | High                                     | 0.74<br>[0.67;0.82] | 0.67<br>[0.59;0.74] | 0.69<br>[0.61;0.76] |
| T2       | N2           | G3    | IIIC                          | 65  |                                          |                     |                     |                     |

| T size | Nodal status | Grade | Clinic Prognostic Stage Group | N   | TIL group<br>High $\geq 30\%$<br>Low $< 30\%$ | 5 Yr OS             | 5 Yr IDFS           | 5 Yr D-DDFS         |
|--------|--------------|-------|-------------------------------|-----|-----------------------------------------------|---------------------|---------------------|---------------------|
| T3     | N1           | G3    | IIIc                          | 5   | Low                                           | 0.58<br>[0.52;0.63] | 0.49<br>[0.44;0.55] | 0.54<br>[0.48;0.59] |
| T3     | N2           | G3    | IIIc                          | 7   |                                               |                     |                     |                     |
| T1     | N2           | G3    | IIIc                          | 59  |                                               |                     |                     |                     |
| T2     | N2           | G3    | IIIc                          | 127 |                                               |                     |                     |                     |
| T3     | N1           | G3    | IIIc                          | 13  |                                               |                     |                     |                     |
| T3     | N1           | G3    | IIIc                          | 13  |                                               |                     |                     |                     |
| T3     | N2           | G3    | IIIc                          | 34  |                                               |                     |                     |                     |

**Supplementary Table 2b: Estimated 5-year survival probabilities according to Clinical Prognostic Stage and stratified by TILs in triple-negative breast cancer patients treated with anthracycline-based chemotherapy with taxanes in the adjuvant setting.**

OS: overall survival, IDFS: invasive-disease free survival, D-DFS: distant disease-free survival (for definitions see Loi et al JCO 2019). The 5-year Kaplan-Meier estimates are provided together with bootstrap confidence intervals (1000 samples).

| T size   | Nodal status    | Grade | Clinic Prognostic Stage Group | N  | TIL group<br>High $\geq 30\%$<br>Low $<30\%$ | 5 Yr OS          | 5 Yr IDFS        | 5 Yr D-DFS       |      |                  |                  |                  |
|----------|-----------------|-------|-------------------------------|----|----------------------------------------------|------------------|------------------|------------------|------|------------------|------------------|------------------|
| T1 <2cm  | N0              | G1    | IB                            | 0  | High                                         | 0.86 [0.62;1]    | 0.80 [0.60;1]    | 0.86 [0.60;1]    |      |                  |                  |                  |
| T1       | N0              | G2    | IB                            | 2  |                                              |                  |                  |                  |      |                  |                  |                  |
| T1       | N0              | G3    | IB                            | 8  |                                              |                  |                  |                  |      |                  |                  |                  |
| T1       | N0              | G1    | IB                            | 2  | Low                                          | 0.93 [0.86;0.88] | 0.87 [0.78;0.94] | 0.93 [0.85;0.98] |      |                  |                  |                  |
| T1       | N0              | G2    | IB                            | 8  |                                              |                  |                  |                  |      |                  |                  |                  |
| T1       | N0              | G3    | IB                            | 42 |                                              |                  |                  |                  |      |                  |                  |                  |
| T1       | N1 (1-3)        | G1    | IIA                           | 6  | High                                         | 1 [1;1]          | 1 [1;1]          | 1 [1;1]          |      |                  |                  |                  |
| T2 2-5cm | N0              | G1    | IIA                           | 0  |                                              |                  |                  |                  |      |                  |                  |                  |
| T1       | N1              | G1    | IIA                           | 12 | Low                                          | 0.75 [0.58;0.92] | 0.75 [0.50;0.92] | 0.75 [0.58;0.92] |      |                  |                  |                  |
| T2       | N0              | G1    | IIA                           | 0  |                                              |                  |                  |                  |      |                  |                  |                  |
| T1       | N1              | G2    | IIB                           | 6  | High                                         | 0.96 [0.92;1]    | 0.93 [0.87;0.98] | 0.97 [0.92;1]    |      |                  |                  |                  |
| T2       | N0              | G2    | IIB                           | 0  |                                              |                  |                  |                  |      |                  |                  |                  |
| T1       | N1              | G3    | IIB                           | 25 |                                              |                  |                  |                  |      |                  |                  |                  |
| T2       | N0              | G3    | IIB                           | 19 |                                              |                  |                  |                  |      |                  |                  |                  |
| T2       | N1              | G1    | IIB                           | 12 |                                              |                  |                  |                  |      |                  |                  |                  |
| T3 >5cm  | N0              | G1    | IIB                           | 0  | Low                                          | 0.86 [0.81;0.91] | 0.74 [0.67;0.80] | 0.81 [0.76;0.86] |      |                  |                  |                  |
| T1       | N1              | G2    | IIB                           | 19 |                                              |                  |                  |                  |      |                  |                  |                  |
| T2       | N0              | G2    | IIB                           | 7  |                                              |                  |                  |                  |      |                  |                  |                  |
| T1       | N1              | G3    | IIB                           | 54 |                                              |                  |                  |                  |      |                  |                  |                  |
| T2       | N0              | G3    | IIB                           | 52 |                                              |                  |                  |                  |      |                  |                  |                  |
| T2       | N1              | G1    | IIB                           | 19 |                                              |                  |                  |                  |      |                  |                  |                  |
| T3       | N0              | G1    | IIB                           | 0  | High                                         | 0.82 [0.74;0.89] | 0.78 [0.70;0.86] | 0.82 [0.74;0.90] |      |                  |                  |                  |
| T2       | N1              | G2    | IIIB                          | 7  |                                              |                  |                  |                  |      |                  |                  |                  |
| T3       | N0              | G2    | IIIB                          | 0  |                                              |                  |                  |                  |      |                  |                  |                  |
| T2       | N1              | G3    | IIIB                          | 41 |                                              |                  |                  |                  |      |                  |                  |                  |
| T3       | N0              | G3    | IIIB                          | 1  |                                              |                  |                  |                  |      |                  |                  |                  |
| T1       | N2 ( $\geq 4$ ) | G1    | IIIB                          | 2  |                                              |                  |                  |                  |      |                  |                  |                  |
| T2       | N2              | G1    | IIIB                          | 4  |                                              |                  |                  |                  |      |                  |                  |                  |
| T3       | N1              | G1    | IIIB                          | 1  |                                              |                  |                  |                  |      |                  |                  |                  |
| T3       | N2              | G1    | IIIB                          | 0  |                                              |                  |                  |                  |      |                  |                  |                  |
| T1       | N2              | G2    | IIIB                          | 4  |                                              |                  |                  |                  |      |                  |                  |                  |
| T2       | N2              | G2    | IIIB                          | 4  |                                              |                  |                  |                  |      |                  |                  |                  |
| T3       | N1              | G2    | IIIB                          | 0  |                                              |                  |                  |                  |      |                  |                  |                  |
| T3       | N2              | G2    | IIIB                          | 0  |                                              |                  |                  |                  |      |                  |                  |                  |
| T2       | N1              | G2    | IIIB                          | 18 | Low                                          | 0.69 [0.62;0.75] | 0.57 [0.51;0.64] | 0.61 [0.54;0.68] |      |                  |                  |                  |
| T3       | N0              | G2    | IIIB                          | 0  |                                              |                  |                  |                  |      |                  |                  |                  |
| T2       | N1              | G3    | IIIB                          | 88 |                                              |                  |                  |                  |      |                  |                  |                  |
| T3       | N0              | G3    | IIIB                          | 3  |                                              |                  |                  |                  |      |                  |                  |                  |
| T1       | N2              | G1    | IIIB                          | 8  |                                              |                  |                  |                  |      |                  |                  |                  |
| T2       | N2              | G1    | IIIB                          | 7  |                                              |                  |                  |                  |      |                  |                  |                  |
| T3       | N1              | G1    | IIIB                          | 1  |                                              |                  |                  |                  |      |                  |                  |                  |
| T3       | N2              | G1    | IIIB                          | 2  |                                              |                  |                  |                  |      |                  |                  |                  |
| T1       | N2              | G2    | IIIB                          | 6  |                                              |                  |                  |                  |      |                  |                  |                  |
| T2       | N2              | G2    | IIIB                          | 12 |                                              |                  |                  |                  |      |                  |                  |                  |
| T3       | N1              | G2    | IIIB                          | 4  |                                              |                  |                  |                  |      |                  |                  |                  |
| T3       | N2              | G2    | IIIB                          | 4  |                                              |                  |                  |                  |      |                  |                  |                  |
| T1       | N2              | G3    | IIIC                          | 14 |                                              |                  |                  |                  | High | 0.67 [0.55;0.79] | 0.58 [0.44;0.67] | 0.58 [0.45;0.70] |
| T2       | N2              | G3    | IIIC                          | 22 |                                              |                  |                  |                  |      |                  |                  |                  |
| T3       | N1              | G3    | IIIC                          | 4  |                                              |                  |                  |                  |      |                  |                  |                  |



| <b>T size</b> | <b>Nodal status</b> | <b>Grade</b> | <b>Clinic Prognostic Stage Group</b> | <b>N</b> | <b>TIL group<br/>High <math>\geq 30\%</math><br/>Low <math>&lt; 30\%</math></b> | <b>5 Yr OS</b>      | <b>5 Yr IDFS</b>    | <b>5 Yr D-DFS</b>   |
|---------------|---------------------|--------------|--------------------------------------|----------|---------------------------------------------------------------------------------|---------------------|---------------------|---------------------|
| T3            | N2                  | G3           | IIC                                  | 4        |                                                                                 |                     |                     |                     |
| T1            | N2                  | G3           | IIC                                  | 22       | Low                                                                             | 0.58<br>[0.48;0.67] | 0.54<br>[0.45;0.62] | 0.57<br>[0.48;0.66] |
| T2            | N2                  | G3           | IIC                                  | 47       |                                                                                 |                     |                     |                     |
| T3            | N1                  | G3           | IIC                                  | 8        |                                                                                 |                     |                     |                     |
| T3            | N2                  | G3           | IIC                                  | 14       |                                                                                 |                     |                     |                     |
